# Supplementary material for: Intratumoral IL-12 delivery empowers CAR-T cell immunotherapy in a pre-clinical model of glioblastoma
Source: PubMed Central journal article supplement (PMC7815781; doi:10.1038/s41467-020-20599-x), 2021-01-19
Supplement: 41467_2020_20599_MOESM1_ESM.pdf [file 41467_2020_20599_MOESM1_ESM.pdf]

## **SUPPLEMENTARY INFORMATION**

### **Intratumoral IL-12 delivery empowers CAR-T cell immunotherapy in a pre-clinical model of glioblastoma**

Giulia Agliardi, Anna Rita Liuzzi et al.

Corresponding authors:

Burkhard Becher. E-Mail: [becher@immunology.uzh.ch](mailto:becher@immunology.uzh.ch)

Karin Straathof. E-Mail: [k.straathof@ucl.ac.uk](mailto:k.straathof@ucl.ac.uk)

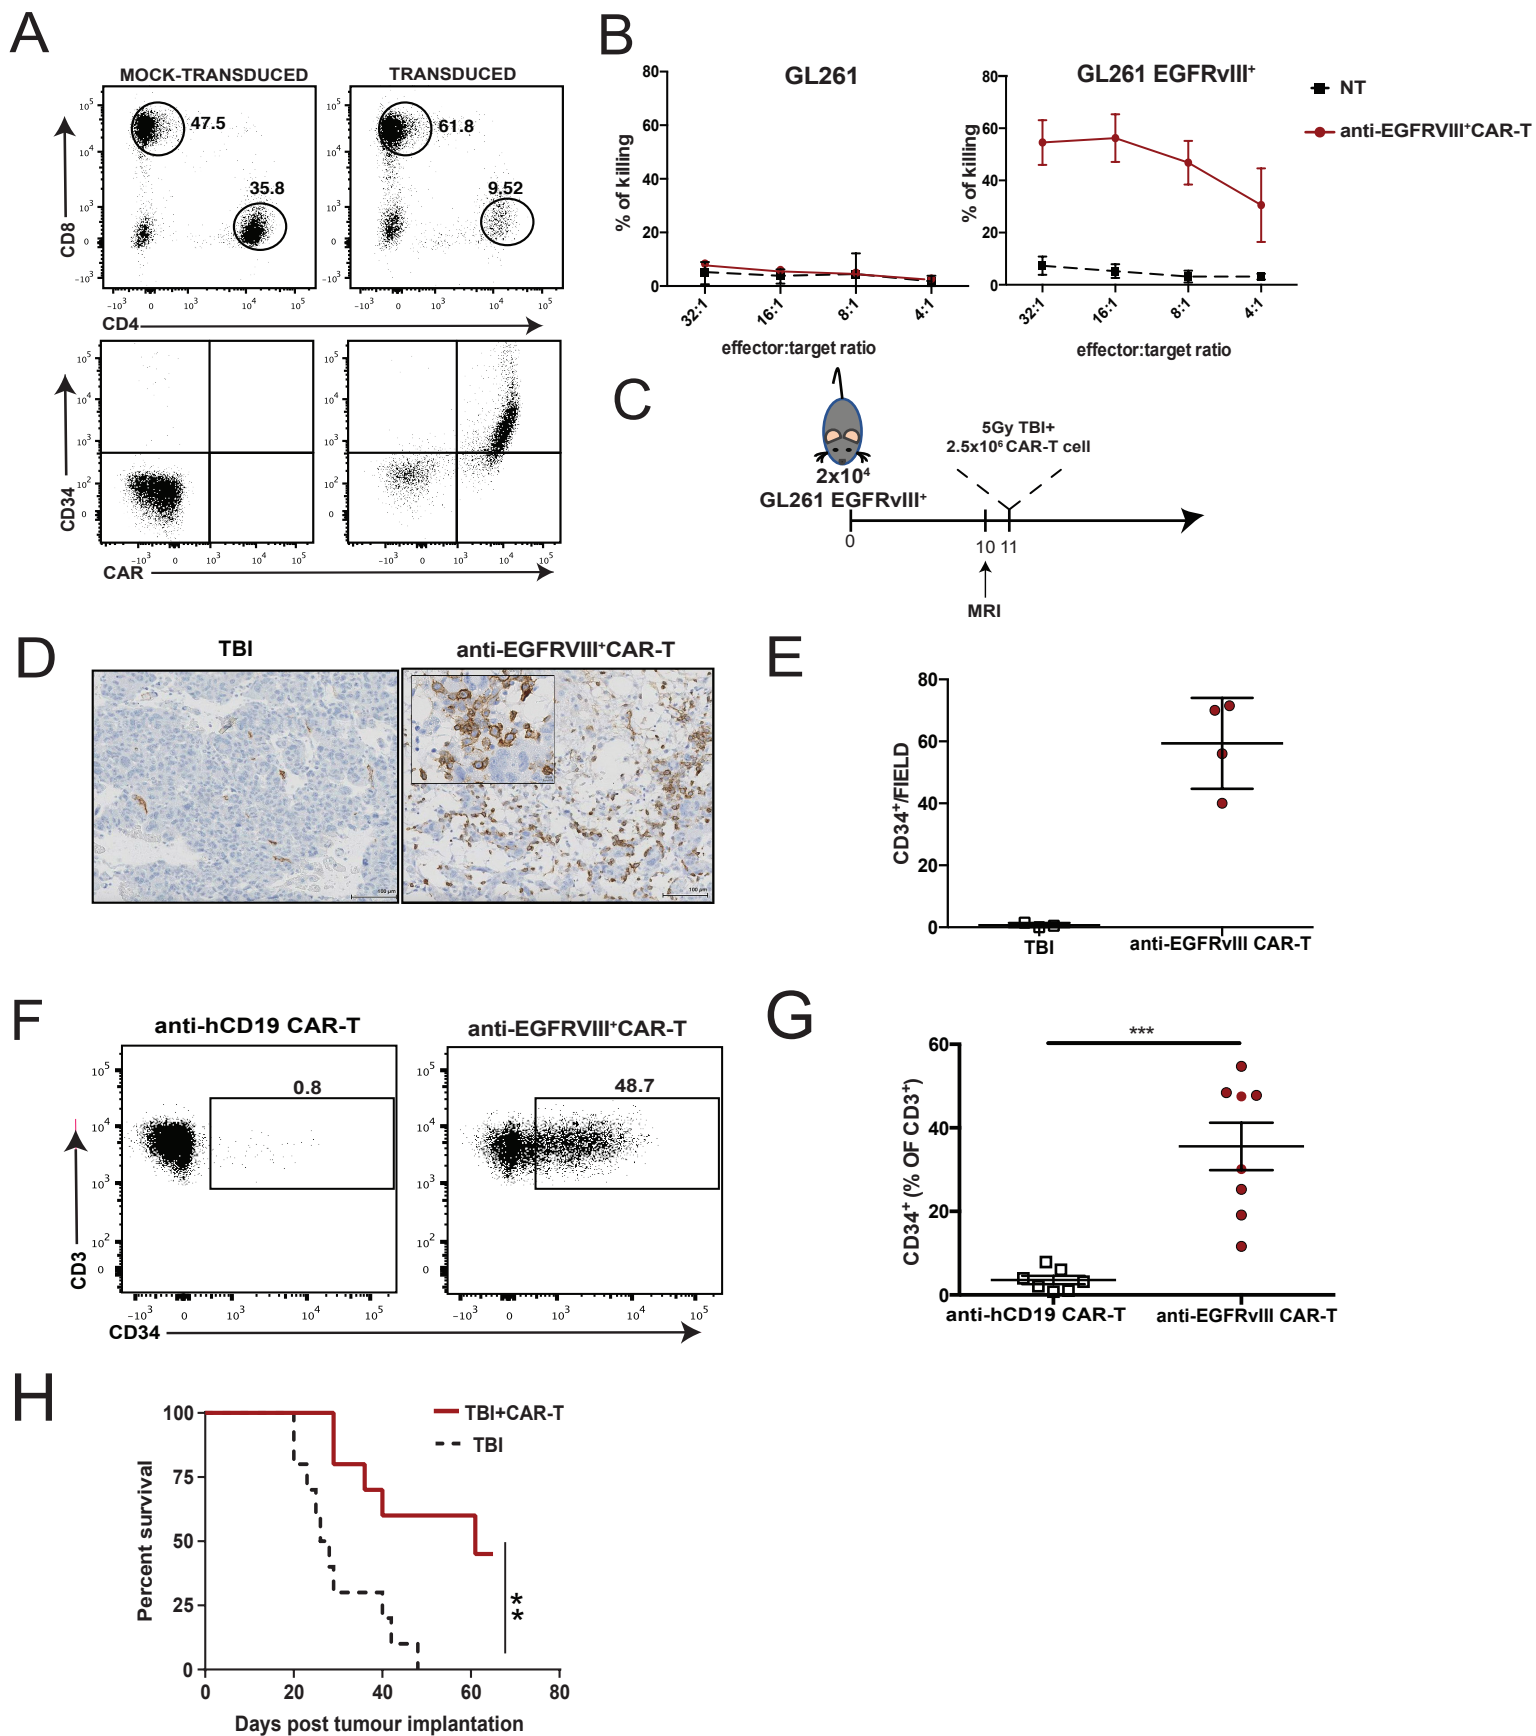

**Supplementary Figure 1. Murine CAR-T cells recognize EGFRvIII+ GL261 in vitro and specifically infiltrate EGFRvIII+ tumors in vivo.**

**(A)** Transduction efficiency of mock-transduced splenocytes (left panel) and EGFRvIII CAR-transduced splenocytes (right panel). Transduced cells co-express CD34 (y axis) and the CAR (x axis) (stained with an EGFRvIII peptide conjugated to mouse IgG2a). **(B)** Chromium release assay showing specific lysis of EGFRvIII-expressing GL261 but not parental cell line GL261 by anti-EGFRvIII CAR-T cells (Data are presented as mean  $\pm$  SD of biological replicates from three independent experiments). **(C)** Experiment timeline. GL261 EGFRvIII+ cells were implanted in the right striatum at day 0. Tumor engraftment was confirmed at day 10 by MRI and the day after mice received 5Gy total body irradiation followed by intravenous injection of  $2.5 \times 10^6$  CAR-T cells. Mice receiving TBI only but no T cells were used as control. **(D)** CAR-T cell infiltration 7 days post infusion was confirmed by immunohistochemistry for the marker gene CD34. Mice receiving TBI but no T cells were used as control. **(E)** Quantification of **(D)** (Data are presented as mean values  $\pm$  SD n=4 mice). **(F)** CAR-T cell antigen-specific infiltration was confirmed by FACS analysis 8 days post T cell transfer. CAR-T cells were identified as CD3+CD34+ cells and hCD19-specific CAR T cells were used as negative control **(G)** Quantification of **(F)**: CAR-T cell infiltration expressed as percentage of CD34+ T cells of total CD3+ (Data are presented as mean values  $\pm$  SEM. hCD19 CAR n=7, EGFRvIII CAR n=8 biological replicates from 2 independent experiments). **(H)** Survival curves of **(C)** p=0.0028 (\*\*), Log-rank test, n=10 per group from two independent experiments. Source data are provided as a Source Data file.

**A**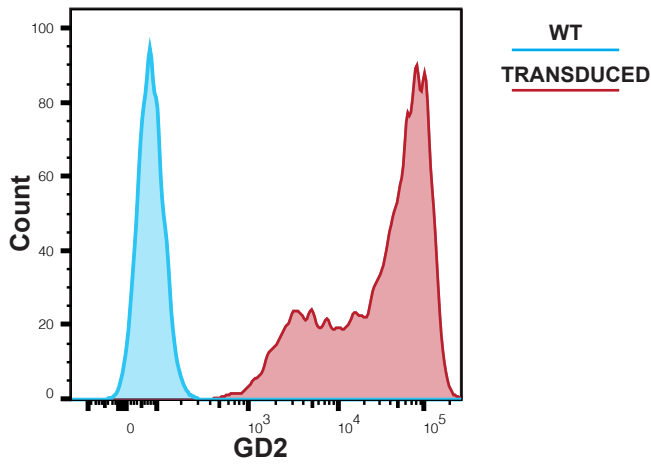**B**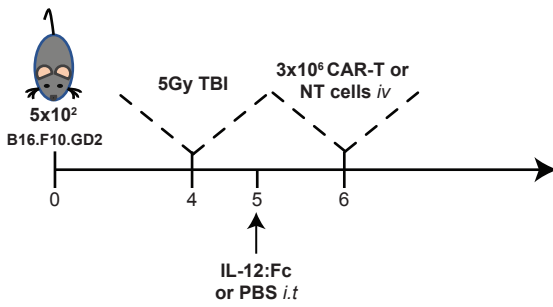**C**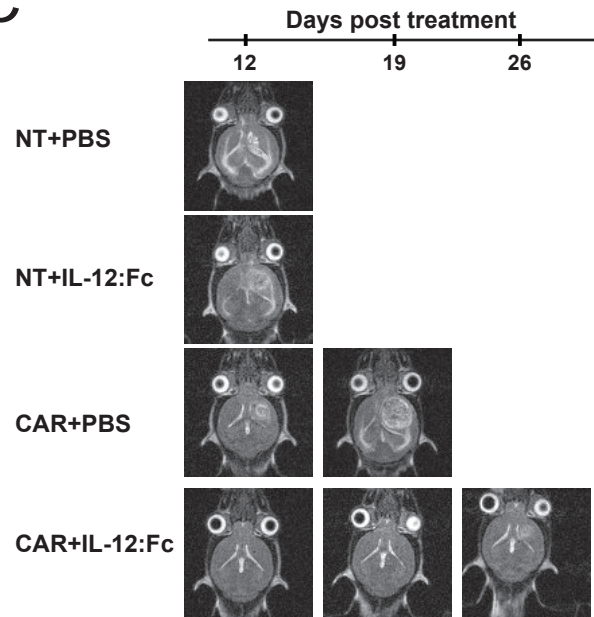**D**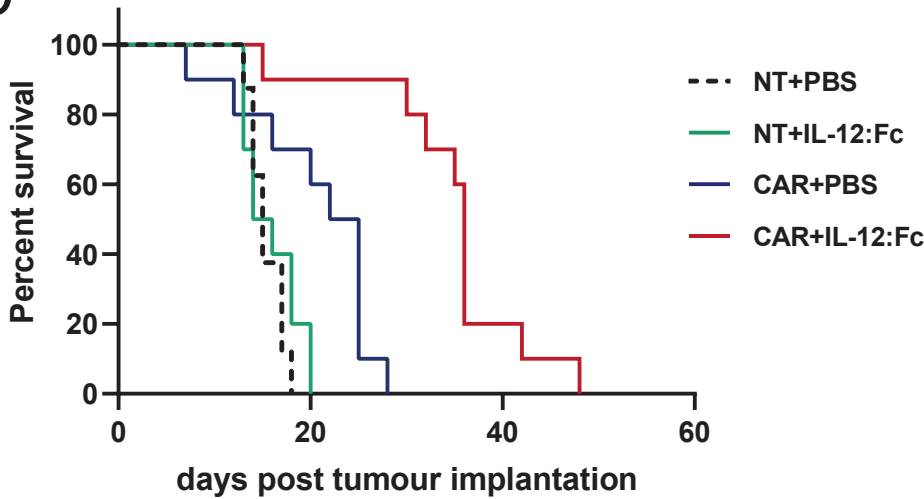

**Supplementary Figure 2. Combination of GD2-specific CAR-T cells and IL-12:Fc enables better control of intracranial B16.F10.GD2+ tumors.** (A) B16.F10 cells were transduced to express the GD2/GD3 synthase and stained for surface GD2 expression (Blue line: wild type; Red line: transduced). (B) Experiment timeline. B16.F10.GD2+ cells were implanted in the right striatum at day 0. Mice received 5Gy TBI on day 4 post implantation, followed by either PBS or 300ng of IL-12:Fc at tumor site on day 5, and intravenous injection of  $3 \times 10^6$  CAR-T cells or non-transduced cells. Tumor growth was monitored weekly. (C) Representative MRI images (axial view) of one mouse per group. (D) Survival curves (NT+PBS n=8, CAR+PBS n=10, NT+IL-12:Fc n=10, CAR+IL-12:Fc n=10 treated in two independent experiments) are shown. \*  $p=0.0108$ , \*\*\*  $p=0.0001$ , \*\*\*\*  $p<0.0001$  (Log-rank test). Source data are provided as a Source Data file.

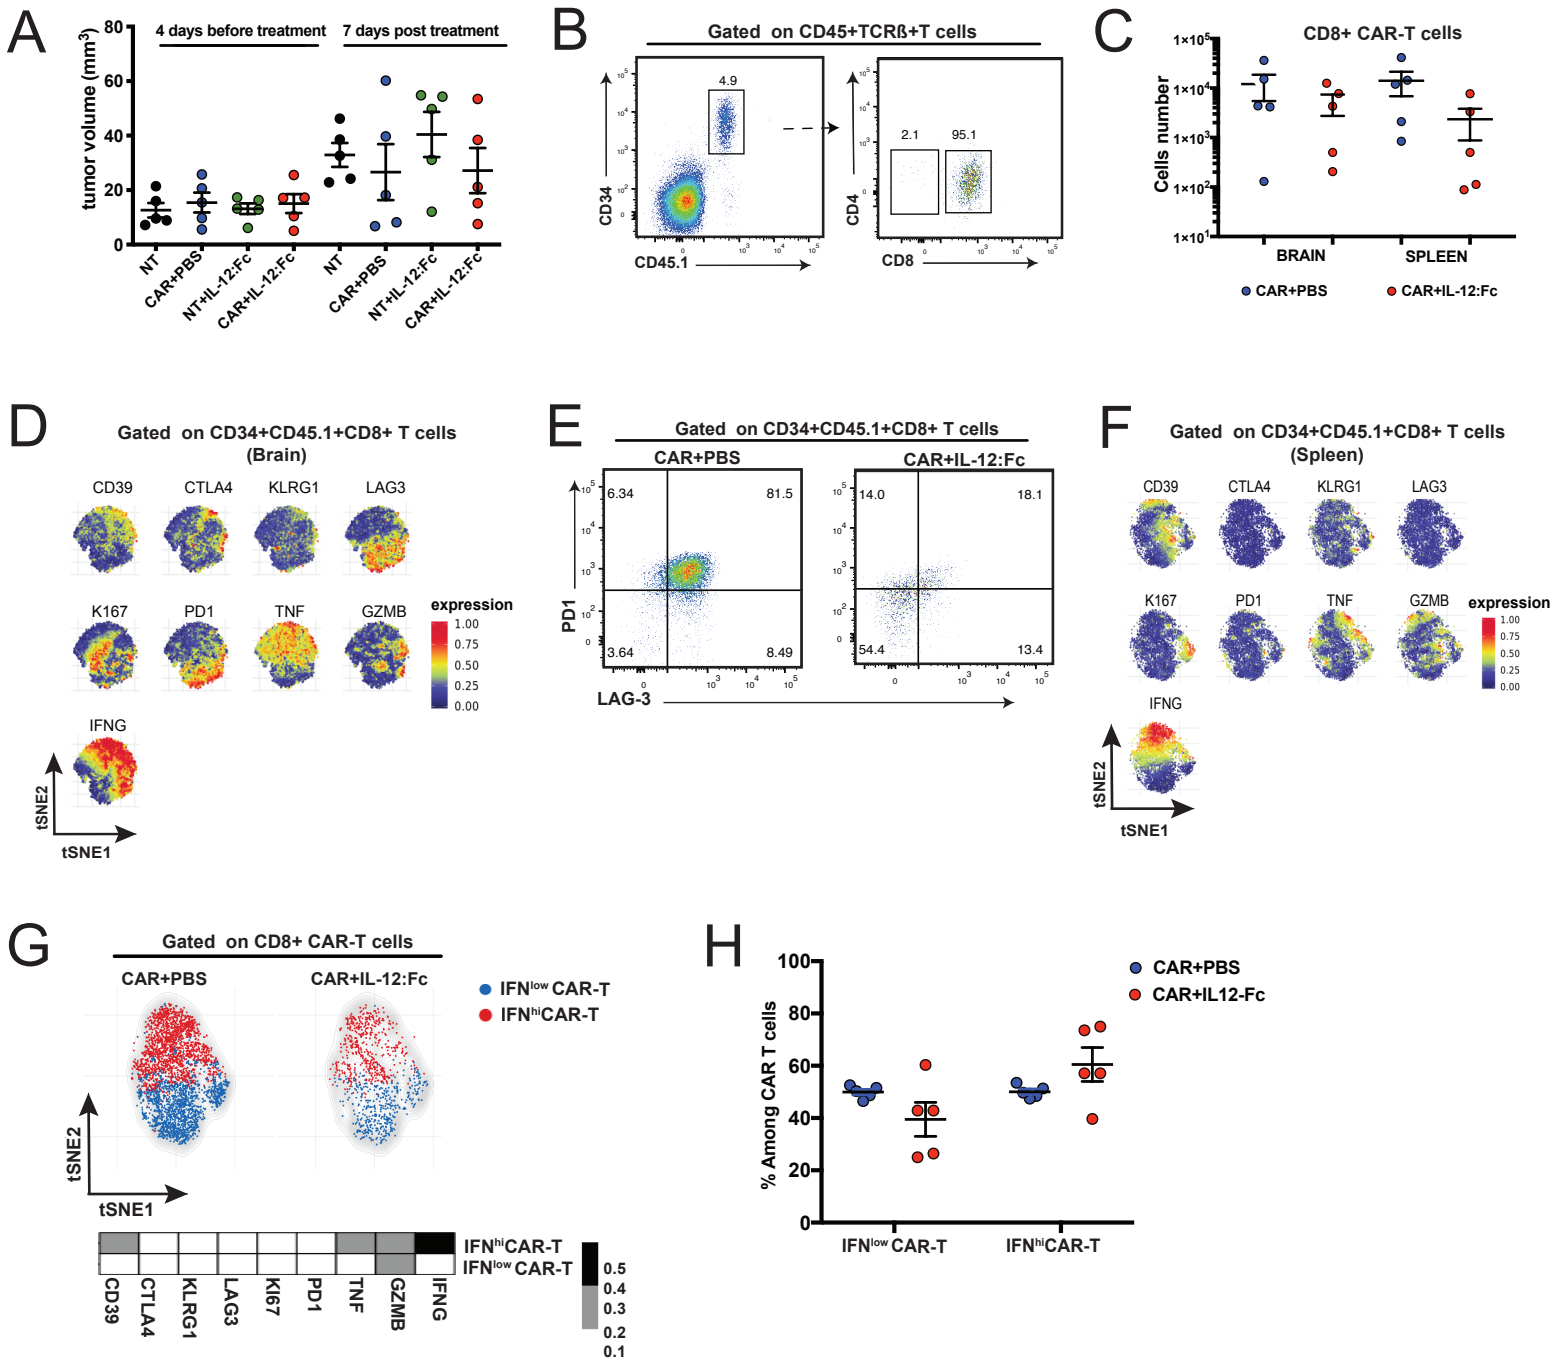

**Supplementary Figure 3. IL-12:Fc administration does not affect CAR-T cell infiltration within the tumor, but improves their pro-inflammatory phenotype.** (A) Tumor volume per each condition at day 4 before treatment and day 7 post treatment, (NT+PBS n=4, NT+IL-12:Fc n=5, CAR+PBS n=5, CAR+IL-12:Fc n=5 mice, representative of n=2 independent experiments). (B) Manual gating of flow cytometry data on CAR T defined as CD45.1+TCR-beta+CD34+ and afterwards divided in CD4 and CD8 positive cells. Representative brain sample among glioma-bearing mice treated with CAR+IL-12:Fc. (C) Cell number of CD8+ CAR T cells in brain and spleen in mice receiving either CAR-T cells alone or in combination with IL-12:Fc, n=5 mice per condition from one experiment. (D) t-SNE map displaying stochastically selected CAR T-cells CD34+CD45.1+ CD8+ T cells from brain. (E) Manual gating of flow cytometry data on CAR T cells CD8+ LAG3+PD1+ in mice receiving either CAR T cells alone or in combination with IL-12:Fc. (F) t-SNE map displaying stochastically CAR-T cells CD34+CD45.1+ CD8+ T cells from spleen. (G) t-SNE map showing the FlowSOM-guided metaclustering gated on CD34+CD45.1+ CD8+CAR T-cells from spleen and heatmap showing the median marker expression for each defined metacluster (value range: 0–1). (H) Frequencies of the two CD34+CD45.1+CD8+CAR-T cells subclusters among total CD8+CAR T-cells within the different conditions in the spleen, n=5 mice per condition. Data are presented as mean values ± SEM. Ordinary One-way Anova with Dunnett multiple comparison test (A), 2-tailed Unpaired Mann-Whitney T test (C, H). Source data are provided as a Source Data file.

**A**

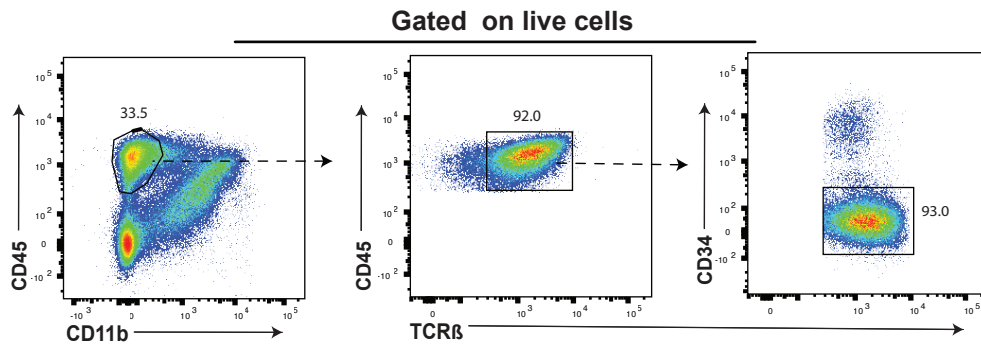

**B**

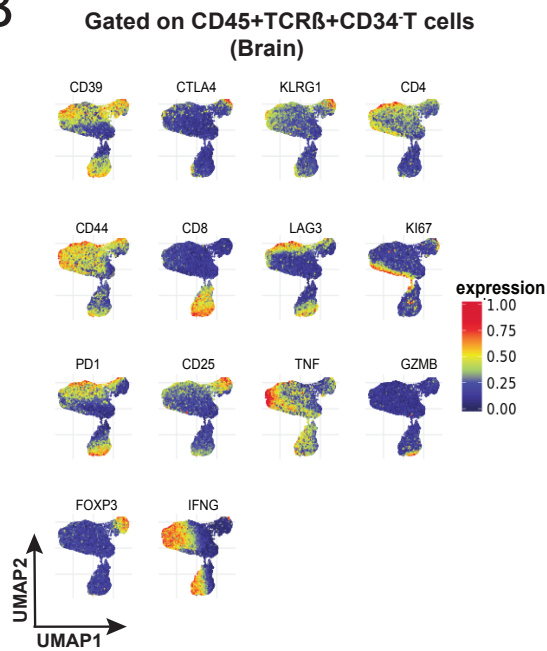

**C**

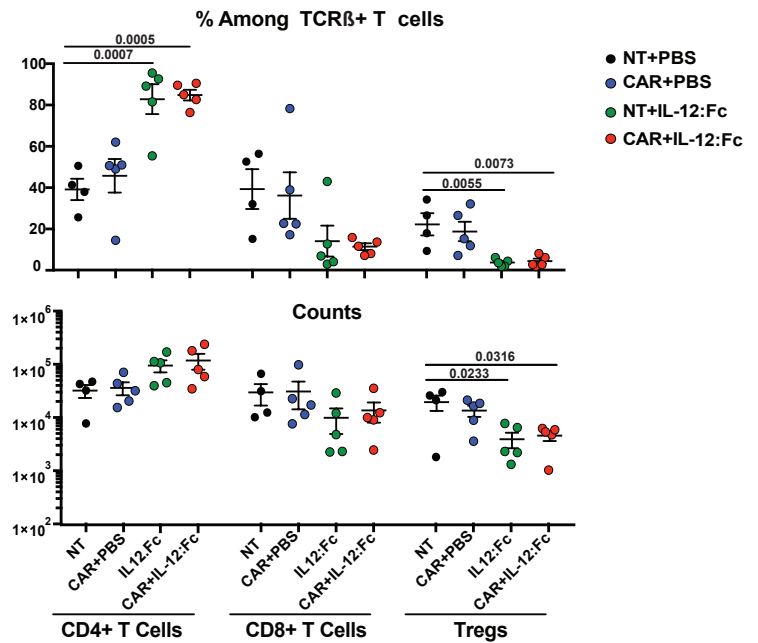

**D**

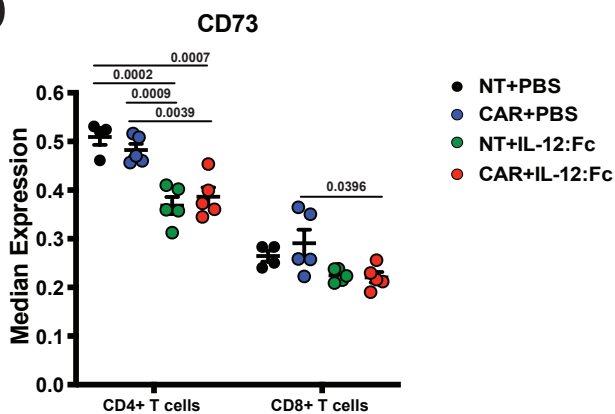

**Supplementary Figure 4. Post treatment endogenous T cells frequency and functional marker median expression. (A)** Manual gating for endogenous T cells: live cells were gated on CD45+CD11b+ cells, T cells were defined as CD45+TCR-beta+ cells and subsequently as TCR-beta+CD34- cells to exclude CAR-T cells. Representative sample among glioma-bearing mice treated with CAR-T cells. **(B)** UMAP displaying stochastically selected CD45+TCR-β+ T cells from brain. **(C)** Frequencies (top panel) and cell counts (bottom panel) of the three TCR-β+ T-cells subclusters among total TCR-β+ T-cells within the different conditions, (NT+PBS n=4, NT+IL-12:Fc n=5, CAR+PBS n=5, CAR+IL-12:Fc n=5 mice, replicates from 2 independent experiments). **(D)** CD73 median expression on CD4 and CD8 T cells, (NT+PBS n=4, NT+IL-12:Fc n=5, CAR+PBS n=5, CAR+IL-12:Fc n=5, replicates from 2 independent experiments). Data are presented as mean values ± SEM. Ordinary One-way Anova with Dunnett's multiple comparison **(C)**, Ordinary One-way Anova with Turkey's multiple comparison **(D)**. Source data are provided as a Source Data file.

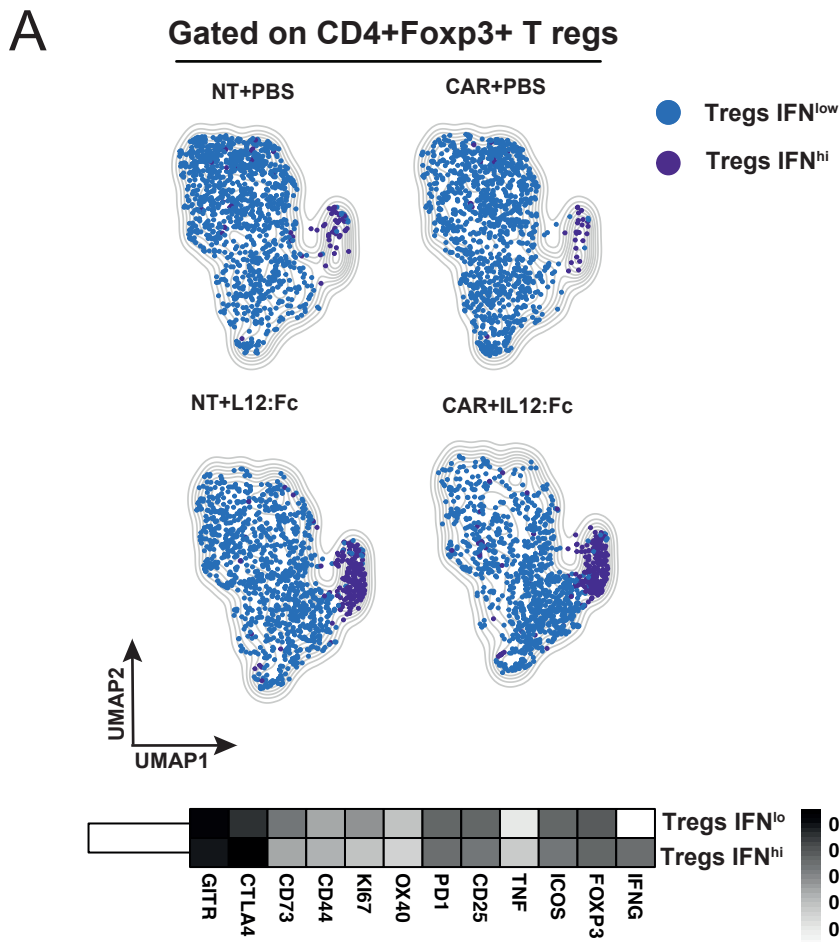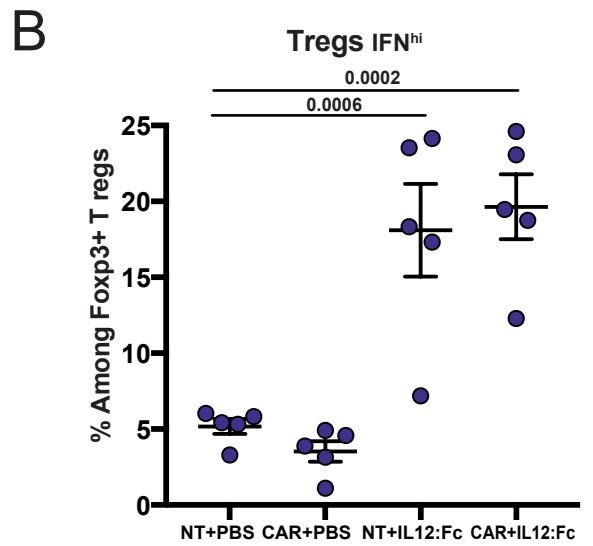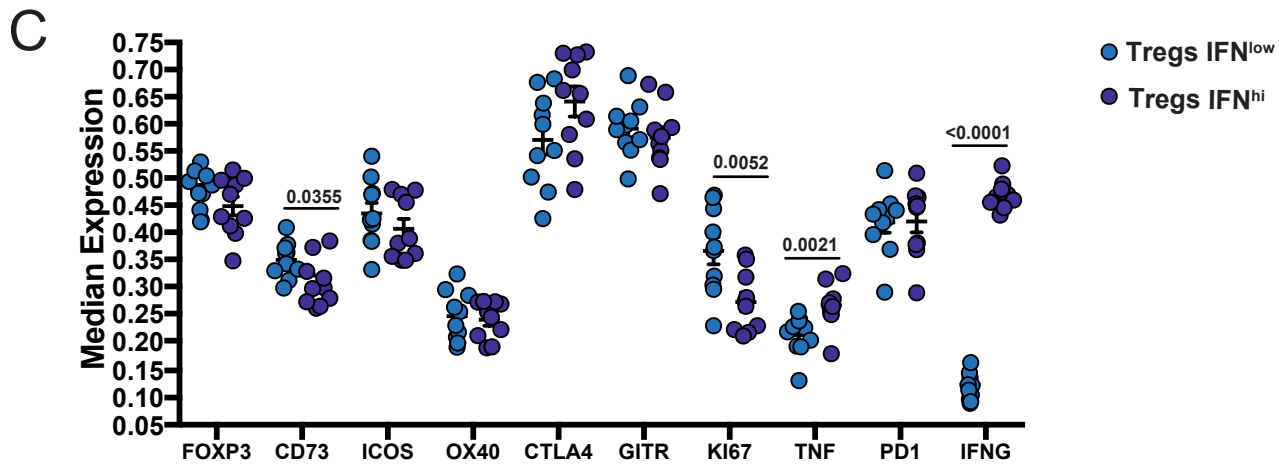

**Supplementary Figure 5. IL-12:Fc administration increases the frequency of IFN-gamma producing Treg.** (A) UMAP displaying stochastically selected CD4+Foxp3+ Tregs exported from live TCR- $\beta$ + T-cells. Heatmap showing the median marker expression for each defined metacluster (value range: 0–1). (B) Frequency of IFN-gamma high Tregs in each condition, n=5 mice per condition. (C) Median expression of selected cell markers shown for Tregs with high (IFN-gamma hi) and low (IFN-gamma low) IFN-gamma production in both IL-12:Fc and CAR+IL-12:Fc conditions, n=10 mice per cluster. Data are presented as mean values  $\pm$  SEM. Ordinary One-way Anova with Dunnett's multiple comparison (B), 2-tailed Unpaired Mann-Whitney T test (C). Representative of 2 independent experiments. Source data are provided as a Source Data file.

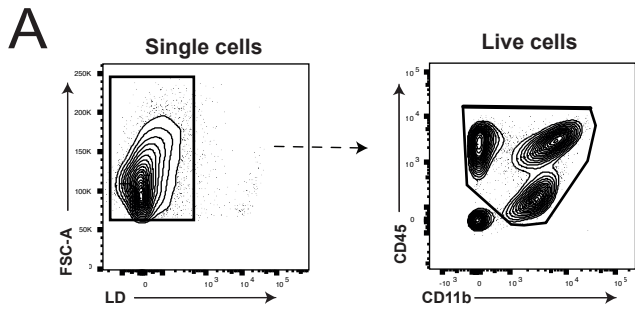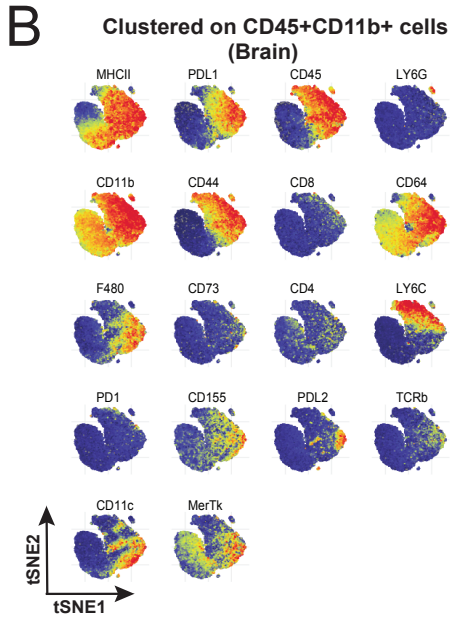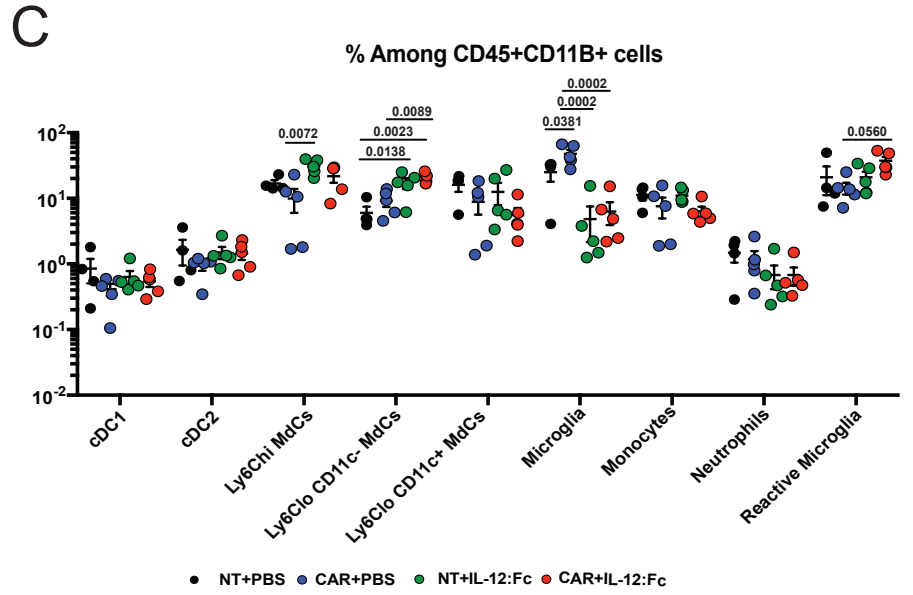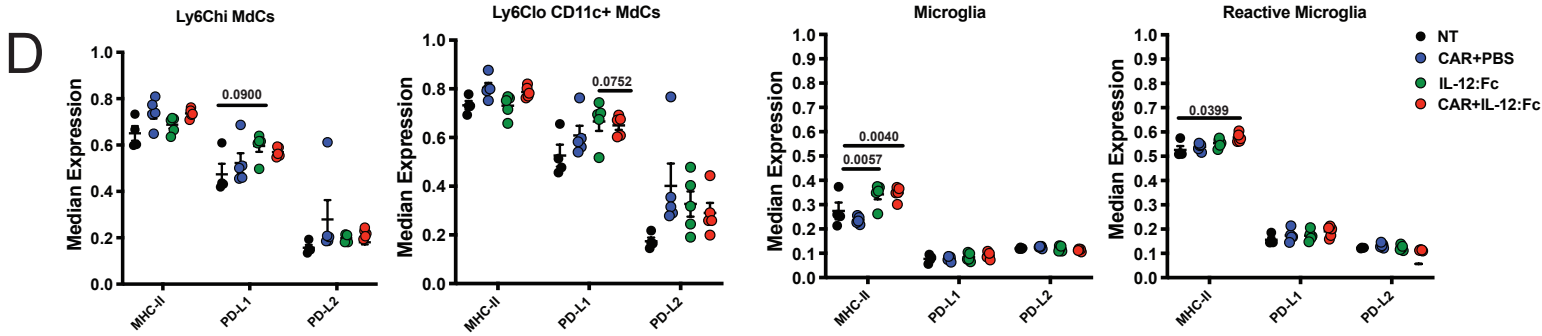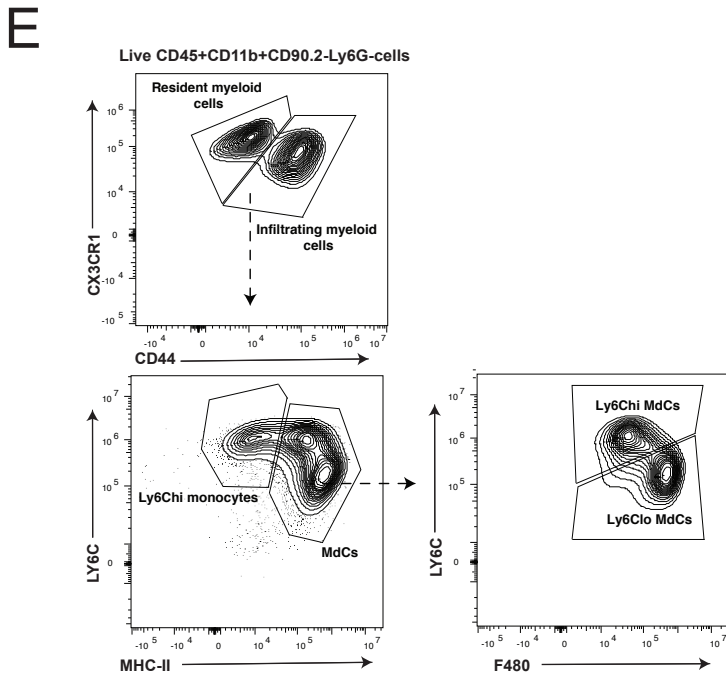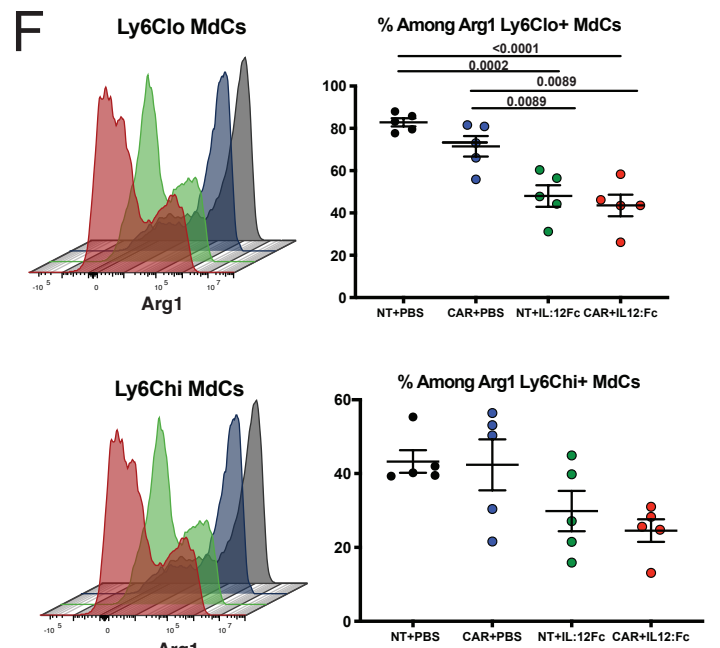

**Supplementary Figure 6. Post treatment endogenous myeloid cells frequency and functional marker median expression.**

**(A)** Manual gating of flow cytometry data on major leukocyte populations present in a representative brain sample of glioma. Live cells were gated on CD11b+CD45+ cells and exported in R for FlowSOM metaclustering. CD45+CD11b- cells were excluded after the metaclustering. **(B)** Umap displaying stochastically selected CD45+CD11b+ cells from brain. **(C)** Frequencies of the nine CD11b+CD45+ subclusters among total CD11b+CD45+ cells within the different conditions, (NT+PBS n=4, NT+IL-12:Fc n=5, CAR+PBS n=5, CAR+IL-12:Fc n=5 mice, replicates from 2 independent experiments). **(D)** Median expression of selected cell markers shown for each condition on Ly6Chi MdCs, Ly6Clo CD11c+ MdCs, Microglia and Reactive Microglia, (NT+PBS n=4, NT+IL-12:Fc n=5, CAR+PBS n=5, CAR+IL-12:Fc n=5 mice, replicates from 2 independent experiments). **(E)** Manual gating for MdCs: live cells were gated on CD45+CD11b+CD90.2-Ly6G-cells, next CD44+CX3CR1+ cells were defined as infiltrating myeloid cells and subsequently Ly6C+MHC-II+ cells were defined as MdCs. MdCs were further characterized as F480+ and by the amount of expression of Ly6C. **(F)** Frequency of Arg1 positive MdCs Ly6C<sub>low</sub> (upper panel) and Ly6C<sub>high</sub> (lower panel), n=5 mice per condition from one experiment. Data are presented as mean values  $\pm$  SEM. Ordinary One-way Anova with Turkey's multiple comparison **(C-D, F)**. Source data are provided as a Source Data file.



**Supplementary Table 1. List of antibodies.**

**Extracellular staining**

| Antigens     | Fluorochromes   | Host             | Isotypes | Clones          | Manufacturers  | Dilution Factor | Catalogue Number |
|--------------|-----------------|------------------|----------|-----------------|----------------|-----------------|------------------|
| CD103        | Alexa488        | armenian hamster | IgG      | 2E7             | eBioscience    | 100             | 11103185         |
| CD11b        | BUV661          | rat              | IgG2b    | M1/70           | BD PharmigenTM | 400             | 565080           |
| CD11b        | BUV737          | rat              | IgG2b    | M1/70           | BD             | 400             | 564443           |
| CD11c        | PE-Cy5.5        | armenian hamster | IgG      | N418            | eBioscience    | 400             | 35-0114-82       |
| CD155        | PE              | rat              | IgG2a    | TX56            | BioLegendTM    | 100             | 131507           |
| CD160        | PE              | rat              | IgG2a    | 7H1             | BioLegendTM    | 50              | 143003           |
| CD206        | Alexa700        | rat              | IgG2a    | C068C2          | BioLegendTM    | 100             | 141734           |
| CD25         | BV650           | rat              | IgG1     | PC61            | BioLegendTM    | 100             | 102038           |
| CD27         | BV480           | mouse            | IgG1     | LG3A10          | BD PharmigenTM | 200             | 746742           |
| CD3          | BV785           | rat              | IgG2b, k | 17A2            | BioLegend      | 100             | 100232           |
| CD34         | FITC            | rat              | IgG2a    | RAM34           | eBioscience    | 100             | 11-0341-82       |
| CD39         | A647            | rat              | IgG2a    | Duha59          | BioLegendTM    | 400             | 143807           |
| CD39         | PerCP-eFluor710 | rat              | IgG2b    | 24DMS1          | eBioscience    | 800             | 46-0391-80       |
| CD4          | BV650           | mouse            | IgG2a    | RM4-5           | BioLegendTM    | 400             | 100546           |
| CD4          | BUV496          | rat              | IgG2b    | GK1.5           | BD PharmigenTM | 100             | 564667           |
| CD44         | BUV737          | rat              | IgG2b    | IM7             | BD PharmigenTM | 200             | 612799           |
| CD44         | BV650           | rat              | IgG2b    | IM7             | BioLegend      | 200             | 103049           |
| CD45         | BUV395          | mouse            | IgG2b    | 30-F11          | BD PharmigenTM | 400             | 564279           |
| CD45         | BUV563          | rat              | IgG2b    | 30-F11          | BD PharmigenTM | 400             | 565710           |
| CD45.1       | BV570           | mouse            | IgG2a    | A20             | BioLegendTM    | 200             | 110733           |
| CD45.1       | Biotin          | mouse            | IgG2a    | A20             | BioLegendTM    | 200             | 103103           |
| CD45.1       | BV785           | mouse            | IgG2a    | A20             | BioLegendTM    | 100             | 110743           |
| CD45.2       | Pacific Blue    | mouse            | IgG2a    | 104             | BioLegend      | 400             | 110722           |
| CD64         | BV421           | mouse            | IgG1     | X54-5/7.1       | BioLegendTM    | 100             | 139309           |
| CD64         | PE              | mouse            | IgG1     | X54-5/7.1       | BioLegendTM    | 100             | 139304           |
| CD73         | BV605           | rat              | IgG1     | TY/11.8         | BioLegendTM    | 100             | 127215           |
| CD73         | APC-Cy7         | rat              | IgG1     | TY/11.8         | BioLegendTM    | 100             | 127232           |
| CD8          | BUV805          | rat              | IgG2a    | 53-6.7          | BD PharmigenTM | 100             | 564920           |
| CX3CR1       | BV605           | mouse            | IgG2a    | SA011F11        | BioLegend      | 400             | 149027           |
| EGFRvIII     | Purified        | mouse            | IgG2a    | MR1.1           | In house       | 500 ng/sample   |                  |
| EGFRvIII CAR | AF488           |                  |          | EGFRvIII:mIgG2a | In house       | 500 ng/sample   |                  |
| F4/80        | BV510           | rat              | IgG2a    | BM8             | BioLegend      | 100             | 123135           |
| F4/80        | PE-Cy5          | rat              | IgG2a    | BM8             | BioLegend      | 400             | 123112           |
| GD2          | PE              | Mouse            | IgG2a, k | 14G2a           | BioLegendTM    | 200             | 357303           |
| GITR         | FITC            | rat              | IgG2b    | DTA-1           | BioLegendTM    | 1600            | 126308           |
| ICOS         | PE              | rat              | IgG2b, k | 7E.17G9         | BioLegendTM    | 100             | 117406           |
| KLRG-1       | APC-C7          | syrian hamster   | IgG      | 2F1/KLRG1       | BioLegendTM    | 100             | 138426           |
| LAG3         | BV421           | rat              | IgG1     | C9B7W           | BioLegendTM    | 100             | 125221           |
| Ly-6C        | BV711           | rat              | IgG2c    | HK1.4           | BioLegendTM    | 400             | 128037           |
| LAP          | BV421           | mouse            | IgG1     | TW7-16B4        | BioLegend      | 100             | 141407           |
| Ly6G         | BUV563          | rat              | IgG2a    | 1A8             | BD PharmigenTM | 200             | 565707           |
| Ly6G         | FITC            | rat              | IgG2a    | 1A8             | BioLegend      |                 | 127606           |
| MerTK        | PE-Cy7          | rat              | IgG2a    | DS5MMER         | eBioscience    | 100             | 25-5751-82       |
| MerTK        | SuperBright 780 | rat              | IgG2a    | DS5MMER         | eBioscience    | 100             | 78-5751-82       |
| MHC-II       | BB700           | rat              | IgG2b    | M5/114.15.2     | BD             | 400             | 746197           |
| NK1.1        | BV785           | mouse            | IgG2a    | PK136           | BioLegendTM    | 100             | 108749           |
| OX40         | Biotin          | rat              | IgG1     | OX-86           | BioLegendTM    | 100             | 119403           |
| PD-1         | BV785           | rat              | IgG2a    | 29F.1A12        | BioLegendTM    | 100             | 135225           |
| PD-1         | BV605           | rat              | IgG2a    | 29F.1A12        | BioLegendTM    | 100             | 135220           |
| PD-L1        | APC             | rat              | IgG2b    | 10F.9G2         | BioLegendTM    | 150             | 124311           |
| PD-L1        | PE-Cy7          | rat              | IgG2a    | MIH5            | eBioscience    | 200             | 25-5982-82       |
| PD-L2        | PE-Dazzle594    | rat              | IgG2a    | TY25            | BioLegendTM    | 150             | 107216           |
| Streptavidin | BUV395          |                  |          |                 | BD PharmigenTM | 400             | 564176           |
| Streptavidin | BV570           |                  |          |                 | BioLegend      | 400             | 405227           |
| TCRb         | PE-Cy5          | armenian hamster | IgG      | H57-597         | BioLegendTM    | 400             | 109209           |
| XCR-1        | Alexa647        | mouse            | IgG2b    | ZET             | BioLegendTM    | 200             | 148213           |

|                                            |  |  |  |  |              |  |  |
|--------------------------------------------|--|--|--|--|--------------|--|--|
| LIVE/DEAD fixable Aqua dead cell stains    |  |  |  |  | ThermoFisher |  |  |
| LIVE/DEAD fixable Near-IR dead cell stains |  |  |  |  | ThermoFisher |  |  |

**Intracellular staining**

| Antigens   | Fluorochromes   | Host             | Isotypes | Clones       | Manufacturers  | Dilution Factor | Catalogue Number |
|------------|-----------------|------------------|----------|--------------|----------------|-----------------|------------------|
| Arginase-1 | APC             | rat              | IgG2a, k | A1exF5       | Invitrogen     | 200             | 17-3697-82       |
| CTLA-4     | Alexa700        | armenian hamster | IgG1     | UC10-4F10-11 | BD PharmigenTM | 600             | 565778           |
| Eomes      | PerCP-eFluor710 | rat              | IgG2a    | Dan11mag     | eBioscience    | 150             | 61-4875-82       |
| FOXP3      | PE-eFluor610    | rat              | IgG2a    | FJK-16s      | eBioscience    | 200             | 61-5773-82       |
| GRANZYME   | PE              | mouse            | IgG1     | GB11         | BD PharmigenTM | 200             | 561142           |
| IFN-γ      | PE-Cy7          | rat              | IgG1     | XMG1.2       | eBioscience    | 400             | 25-7311-82       |
| IFN-γ      | APC             | rat              | IgG1     | XMG1.2       | BioLegendTM    | 400             | 505810           |
| IL10       | PE-Dazzle594    | rat              | IgG2b    | JES5-16E3    | BioLegend      | 100             | 505033           |
| KI-67      | BV480           | mouse            | IgG1     | B56          | BD PharmigenTM | 100             | 566109           |
| TNF        | BV711           | rat              | IgG      | MP6-XT22     | BioLegendTM    | 200             | 506349           |

**Secondary Ab**

| Antigens | Fluorochromes | Host | Isotypes | Clones     | Manufacturers | Dilution Factor | Catalogue Number |
|----------|---------------|------|----------|------------|---------------|-----------------|------------------|
| mIgG2a   | PE            | Goat |          | polyclonal | Jackson       | 1000            | 115-115-206-JIR  |

**Immunohistochemistry Ab**

| Antigens | Fluorochromes | Host  | Isotypes | Clones | Manufacturers     | Dilution Factor | Catalogue Number |
|----------|---------------|-------|----------|--------|-------------------|-----------------|------------------|
| EGFRvIII | Purified      | Mouse | IgG1     | L84A   | Absolute Antibody | 1000            | Ab00184-1.1      |
| CD34     | Purified      | Rat   | IgG2A, k | RAM34  | eBioscience       | 100             | 14-0341-82       |
